# Supplementary material for: A temporally consistent 8-day 0.05° gap-free snow cover extent dataset over the Northern Hemisphere for the period 1981–2019
Source: Copernicus journal article supplement (doi:10.5194/essd-2021-279), 2021-12-16

Europe (longitude: -30.0 - 55.0 degree, latitude: 30.0 - 75.0 degree)

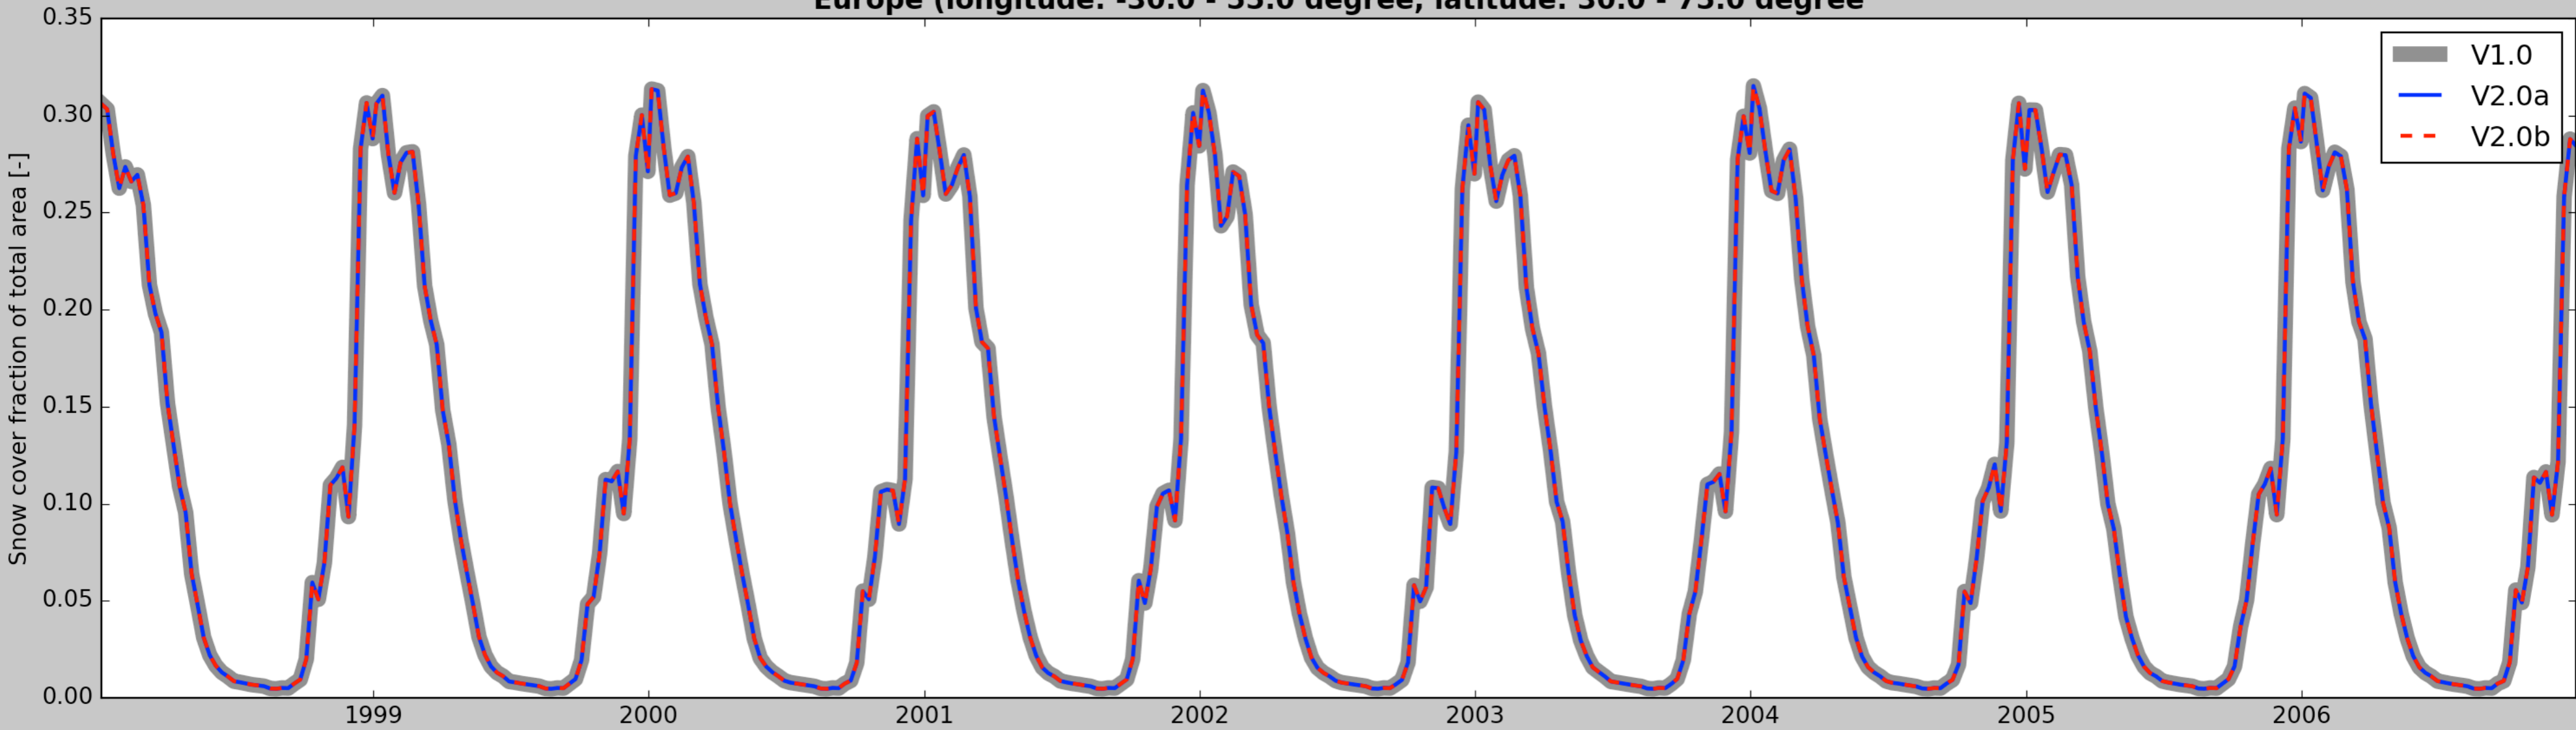

Supplement: Supplementary file [file essd-2021-279-CC1-supplement.pdf]
